# Supplementary material for: The monocyte-to-high-density lipoprotein ratio is associated with the occurrence of atrial fibrillation among NAFLD patients: A propensity-matched analysis
Source: PubMed Central journal article supplement (PMC10086442; doi:10.3389/fendo.2023.1127425), 2023-03-28
Supplement: Image_1.pdf [file Image_1.pdf]

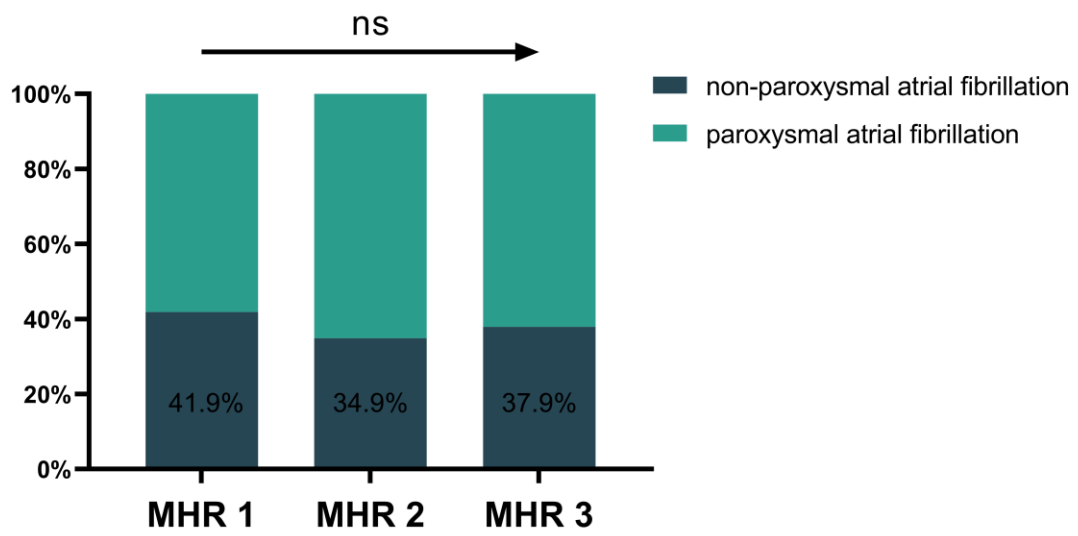

Fig.S1 The relationship between different levels of MHR and different types of AF.
